# Supplementary material for: Incidence and predictors of futile recanalisation after endovascular therapy in acute vertebrobasilar artery occlusion patients: insight from the ANGEL-ACT registry
Source: PubMed Central journal article supplement — Stroke Vasc Neurol. 2023 Oct 12;9(3):289–94. doi: 10.1136/svn-2022-002185 (PMC11221304; doi:10.1136/svn-2022-002185), 2023-10-12
Supplement: svn-2022-002185supp001.pdf [file svn-2022-002185supp001.pdf]

**Supplemental Table 1. Independent predictors of futile recanalization (Model 2)**

| Predictors             | Unadjusted OR (95%CI) | P value | Adjusted OR (95%CI) | P value |
|------------------------|-----------------------|---------|---------------------|---------|
| Admission NIHSS        |                       |         |                     |         |
| ≥ 19 vs. < 19          | 4.01(2.47-6.51)       | <0.001  | 4.81(2.75-8.40)     | <0.001  |
| PLR                    |                       |         |                     |         |
| ≥ 162.2 vs. < 162.2    | 2.18(1.35-3.52)       | 0.002   | 1.86(1.09-3.18)     | 0.022   |
| OTP                    |                       |         |                     |         |
| ≥ 334min vs. < 334 min | 2.17(1.38-3.43)       | 0.001   | 2.11(1.23-3.63)     | 0.007   |
| General anesthesia     |                       |         |                     |         |
| Yes vs. No             | 1.73(1.10-2.72)       | 0.018   | 1.88(1.09-3.25)     | 0.024   |

Model 2 was a back-stepwise multivariable regression analysis including PC-ASPECTS (< 7 vs. ≥ 7), NLR, PLR, NIHSS, OTP, procedure duration, use of GA, and use of heparin during the procedure. Abbreviations: PLR = platelet to lymphocyte ratio; NIHSS = National Institute of Health Stroke Scale; OTP = Onset-to-puncture time.

**Supplemental Figure 1. Independent predictors of futile recanalization**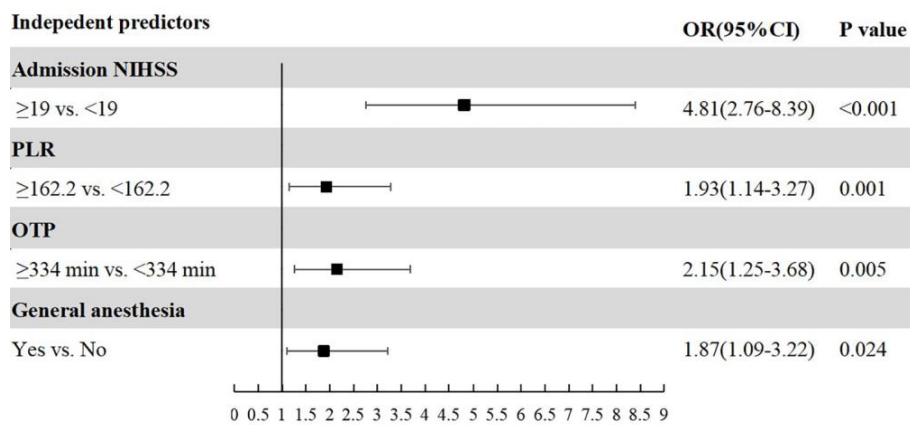

Abbreviations: PLR = platelet to lymphocyte ratio; NIHSS = National Institute of Health Stroke Scale; OTP = Onset-to-puncture time.

**Supplemental Figure 2. ROC curve of NIHSS, PLR, OTP, NLR, and procedure duration**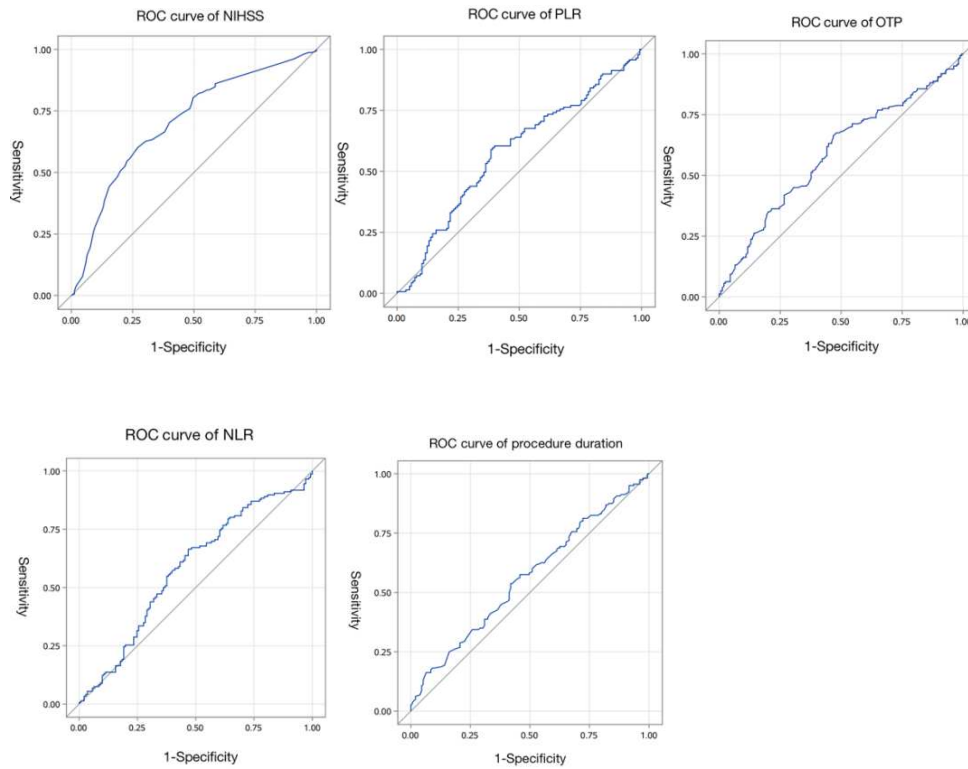

Abbreviations: PLR = platelet to lymphocyte ratio; NIHSS = National Institute of Health Stroke Scale; OTP = Onset-to-puncture time; NLR = neutrophil-lymphocyte ratio; ROC = receiver operating characteristic.
